# Supplementary material for: Women’s Media Use and Preferences of Media-Based Interventions on Lifestyle-Related Risk Factors in Gynecological and Obstetric Care: A Cross-Sectional Multi-Center Study in Germany
Source: MDPI journal article supplement (doi:10.3390/ijerph18189840), 2021-09-18
Supplement: s1 [file s1]

Liebe Teilnehmerin,  
wir bitten Sie die nachfolgenden Fragen zu beantworten. Bitte beachten Sie, dass bei einigen Fragen Mehrfachnennungen möglich sind. Wenn Sie ein Kreuz an einer "falschen" Stelle gemacht haben und es ändern möchten, füllen Sie das falsche Kästchen bitte ganz aus und machen Sie Ihr Kreuzchen erneut. Die Fragen beziehen sich immer auf Ihre individuelle Meinung. Wenn Sie fertig sind, werfen Sie den Fragebogen bitte in die Box.

|                                                                                                                                                                                                                                                          |                                                                                             |
|----------------------------------------------------------------------------------------------------------------------------------------------------------------------------------------------------------------------------------------------------------|---------------------------------------------------------------------------------------------|
| <b>1. Sind Sie momentan schwanger?</b>                                                                                                                                                                                                                   |                                                                                             |
| <input type="checkbox"/> Ja, ich bin in der ____ Schwangerschaftswoche.                                                                                                                                                                                  | <input type="checkbox"/> Nein → Weiter mit Frage 3                                          |
| <b>2. War die Schwangerschaft geplant?</b>                                                                                                                                                                                                               |                                                                                             |
| <input type="checkbox"/> Ja                                                                                                                                                                                                                              | <input type="checkbox"/> Nein                                                               |
| <b>3. Planen Sie innerhalb der nächsten 12 Monate schwanger zu werden?</b>                                                                                                                                                                               |                                                                                             |
| <input type="checkbox"/> Ja → Weiter mit Frage 5                                                                                                                                                                                                         | <input type="checkbox"/> Nein                                                               |
| <b>4. Planen Sie generell (wieder) schwanger zu werden?</b>                                                                                                                                                                                              |                                                                                             |
| <input type="checkbox"/> Ja                                                                                                                                                                                                                              | <input type="checkbox"/> Nein                                                               |
| <b>5. Planen Sie (wieder) zu stillen?</b>                                                                                                                                                                                                                |                                                                                             |
| <input type="checkbox"/> Ja                                                                                                                                                                                                                              | <input type="checkbox"/> Nein                                                               |
| <b>6. Waren Sie schon einmal schwanger?</b>                                                                                                                                                                                                              |                                                                                             |
| <input type="checkbox"/> Ja, das ist meine ____ Schwangerschaft.                                                                                                                                                                                         | <input type="checkbox"/> Nein → Weiter mit Frage 9                                          |
| <b>7. Stillen Sie momentan?</b>                                                                                                                                                                                                                          |                                                                                             |
| <input type="checkbox"/> Ja                                                                                                                                                                                                                              | <input type="checkbox"/> Nein                                                               |
| <b>8. Haben Sie schon einmal gestillt?</b>                                                                                                                                                                                                               |                                                                                             |
| <input type="checkbox"/> Ja                                                                                                                                                                                                                              | <input type="checkbox"/> Nein                                                               |
| <b><u>A Medien in der gynäkologischen Versorgung</u></b>                                                                                                                                                                                                 |                                                                                             |
| <b>9. Welche der folgenden Medien mit Informationen zum Gesundheitsverhalten in der <u>Schwangerschaft</u> nehmen Sie bei Ihrer Frauenärztin/Ihrem Frauenarzt und/oder Ihrer Hebamme/Ihrem Entbindungspfleger wahr? (Mehrfachnennungen sind möglich)</b> |                                                                                             |
| <b><u>Frauenärztin/Frauenarzt:</u></b>                                                                                                                                                                                                                   | <b><u>Hebamme/Entbindungspfleger:</u></b>                                                   |
| <input type="checkbox"/> (Internet-) Adressen von Beratungs-/ Informationsstellen/ Portalen                                                                                                                                                              | <input type="checkbox"/> (Internet-) Adressen von Beratungs-/ Informationsstellen/ Portalen |
| <input type="checkbox"/> Apps                                                                                                                                                                                                                            | <input type="checkbox"/> Apps                                                               |
| <input type="checkbox"/> Bücher                                                                                                                                                                                                                          | <input type="checkbox"/> Bücher                                                             |
| <input type="checkbox"/> Flyer                                                                                                                                                                                                                           | <input type="checkbox"/> Flyer                                                              |
| <input type="checkbox"/> Informationsbroschüren                                                                                                                                                                                                          | <input type="checkbox"/> Informationsbroschüren                                             |
| <input type="checkbox"/> Merkzettel                                                                                                                                                                                                                      | <input type="checkbox"/> Merkzettel                                                         |
| <input type="checkbox"/> Tonaufnahmen/Podcasts                                                                                                                                                                                                           | <input type="checkbox"/> Tonaufnahmen/Podcasts                                              |
| <input type="checkbox"/> Video-/Filmmaterial                                                                                                                                                                                                             | <input type="checkbox"/> Video-/Filmmaterial                                                |
| <input type="checkbox"/> Zeitschriften                                                                                                                                                                                                                   | <input type="checkbox"/> Zeitschriften                                                      |
| <input type="checkbox"/> Keine Medien                                                                                                                                                                                                                    | <input type="checkbox"/> Keine Medien                                                       |
| <input type="checkbox"/> Sonstige Medien: _____                                                                                                                                                                                                          | <input type="checkbox"/> Sonstige Medien: _____                                             |

**10. Welche der folgenden Medien mit Informationen zum Gesundheitsverhalten in der Stillzeit nehmen Sie bei Ihrer Frauenärztin/Ihrem Frauenarzt und /oder Ihrer Hebamme/Ihrem Entbindungspfleger wahr?**  
(Mehrfachnennungen sind möglich)

**Frauenärztin/Frauenarzt:**

- ☐ (Internet-) Adressen von Beratungs-/ Informationsstellen/ Portalen
- ☐ Apps
- ☐ Bücher
- ☐ Flyer
- ☐ Informationsbroschüren
- ☐ Merkzettel
- ☐ Tonaufnahmen/Podcasts
- ☐ Video-/Filmmaterial
- ☐ Zeitschriften
- ☐ Keine Medien
- ☐ Sonstige Medien: \_\_\_\_\_

**Hebamme/Entbindungspfleger:**

- ☐ (Internet-) Adressen von Beratungs-/ Informationsstellen/ Portalen
- ☐ Apps
- ☐ Bücher
- ☐ Flyer
- ☐ Informationsbroschüren
- ☐ Merkzettel
- ☐ Tonaufnahmen/Podcasts
- ☐ Video-/Filmmaterial
- ☐ Zeitschriften
- ☐ Keine Medien
- ☐ Sonstige Medien: \_\_\_\_\_

**11. Auf welche der folgenden Medien mit Informationen zum Gesundheitsverhalten in der Schwangerschaft wurden Sie von Ihrer Frauenärztin/Ihrem Frauenarzt und oder Ihrer Hebamme/Ihrem Entbindungspfleger hingewiesen?** (Mehrfachnennungen sind möglich)

**Frauenärztin/Frauenarzt:**

- ☐ (Internet-) Adressen von Beratungs-/ Informationsstellen/ Portalen
- ☐ Apps
- ☐ Bücher
- ☐ Flyer
- ☐ Informationsbroschüren
- ☐ Merkzettel
- ☐ Tonaufnahmen/Podcasts
- ☐ Video-/Filmmaterial
- ☐ Zeitschriften
- ☐ Keine Medien
- ☐ Sonstige Medien: \_\_\_\_\_

**Hebamme/Entbindungspfleger:**

- ☐ (Internet-) Adressen von Beratungs-/ Informationsstellen/ Portalen
- ☐ Apps
- ☐ Bücher
- ☐ Flyer
- ☐ Informationsbroschüren
- ☐ Merkzettel
- ☐ Tonaufnahmen/Podcasts
- ☐ Video-/Filmmaterial
- ☐ Zeitschriften
- ☐ Keine Medien
- ☐ Sonstige Medien: \_\_\_\_\_

**12. Auf welche der folgenden Medien mit Informationen zum Gesundheitsverhalten in der Stillzeit wurden Sie von Ihrer Frauenärztin/Ihrem Frauenarzt und oder Ihrer Hebamme/Ihrem Entbindungspfleger hingewiesen?** (Mehrfachnennungen sind möglich)

**Frauenärztin/Frauenarzt:**

- ☐ (Internet-) Adressen von Beratungs-/ Informationsstellen/ Portalen
- ☐ Apps
- ☐ Bücher
- ☐ Flyer
- ☐ Informationsbroschüren
- ☐ Merkzettel
- ☐ Tonaufnahmen/Podcasts
- ☐ Video-/Filmmaterial
- ☐ Zeitschriften
- ☐ Keine Medien
- ☐ Sonstige Medien: \_\_\_\_\_

**Hebamme/Entbindungspfleger:**

- ☐ (Internet-) Adressen von Beratungs-/ Informationsstellen/ Portalen
- ☐ Apps
- ☐ Bücher
- ☐ Flyer
- ☐ Informationsbroschüren
- ☐ Merkzettel
- ☐ Tonaufnahmen/Podcasts
- ☐ Video-/Filmmaterial
- ☐ Zeitschriften
- ☐ Keine Medien
- ☐ Sonstige Medien: \_\_\_\_\_

|                                                                                                                                                                                                                                                                                                                                                                                                                                                                                                                                                                               |                                                                                                                                                                                                                                                                                                                                                                                                                                                                                                                                                                                  |
|-------------------------------------------------------------------------------------------------------------------------------------------------------------------------------------------------------------------------------------------------------------------------------------------------------------------------------------------------------------------------------------------------------------------------------------------------------------------------------------------------------------------------------------------------------------------------------|----------------------------------------------------------------------------------------------------------------------------------------------------------------------------------------------------------------------------------------------------------------------------------------------------------------------------------------------------------------------------------------------------------------------------------------------------------------------------------------------------------------------------------------------------------------------------------|
| <b>13. Verwendet Ihre Frauenärztin/Ihr Frauenarzt und/oder Ihre Hebamme/Ihr Entbindungspfleger Medien (Flyer, Videos, etc.) in der Aufklärung über das Gesundheitsverhalten in der <u>Schwangerschaft</u>?</b>                                                                                                                                                                                                                                                                                                                                                                |                                                                                                                                                                                                                                                                                                                                                                                                                                                                                                                                                                                  |
| <b><u>Frauenärztin/ Frauenarzt:</u></b><br><input type="checkbox"/> Ja<br><input type="checkbox"/> Nein → Weiter mit Frage 15                                                                                                                                                                                                                                                                                                                                                                                                                                                 | <b><u>Hebamme/Entbindungspfleger:</u></b><br><input type="checkbox"/> Ja<br><input type="checkbox"/> Nein → Weiter mit Frage 15                                                                                                                                                                                                                                                                                                                                                                                                                                                  |
| <b>14. Welche der folgenden Medien werden von Ihrer Frauenärztin/Ihrem Frauenarzt und/oder Ihrer Hebamme/Ihrem Entbindungspfleger in der Aufklärung über das Gesundheitsverhalten in der <u>Schwangerschaft</u> verwendet? (Mehrfachnennungen sind möglich)</b>                                                                                                                                                                                                                                                                                                               |                                                                                                                                                                                                                                                                                                                                                                                                                                                                                                                                                                                  |
| <b><u>Frauenärztin/Frauenarzt:</u></b><br><input type="checkbox"/> (Internet-) Adressen von Beratungs-/ Informationsstellen/ Portalen<br><input type="checkbox"/> Apps<br><input type="checkbox"/> Bücher<br><input type="checkbox"/> Flyer<br><input type="checkbox"/> Informationsbroschüren<br><input type="checkbox"/> Merkzettel<br><input type="checkbox"/> Tonaufnahmen/Podcasts<br><input type="checkbox"/> Video-/Filmmaterial<br><input type="checkbox"/> Zeitschriften<br><input type="checkbox"/> Keine Medien<br><input type="checkbox"/> Sonstige Medien: _____ | <b><u>Hebamme/Entbindungspfleger:</u></b><br><input type="checkbox"/> (Internet-) Adressen von Beratungs-/ Informationsstellen/ Portalen<br><input type="checkbox"/> Apps<br><input type="checkbox"/> Bücher<br><input type="checkbox"/> Flyer<br><input type="checkbox"/> Informationsbroschüren<br><input type="checkbox"/> Merkzettel<br><input type="checkbox"/> Tonaufnahmen/Podcasts<br><input type="checkbox"/> Video-/Filmmaterial<br><input type="checkbox"/> Zeitschriften<br><input type="checkbox"/> Keine Medien<br><input type="checkbox"/> Sonstige Medien: _____ |
| <b>15. Verwendet Ihre Frauenärztin/Ihr Frauenarzt und/oder Ihre Hebamme/Ihr Entbindungspfleger Medien (Flyer, Videos, etc.) in der Aufklärung über das Gesundheitsverhalten in der <u>Stillzeit</u>?</b>                                                                                                                                                                                                                                                                                                                                                                      |                                                                                                                                                                                                                                                                                                                                                                                                                                                                                                                                                                                  |
| <b><u>Frauenärztin/ Frauenarzt:</u></b><br><input type="checkbox"/> Ja<br><input type="checkbox"/> Nein → Weiter mit Frage 17                                                                                                                                                                                                                                                                                                                                                                                                                                                 | <b><u>Hebamme/Entbindungspfleger:</u></b><br><input type="checkbox"/> Ja<br><input type="checkbox"/> Nein → Weiter mit Frage 17                                                                                                                                                                                                                                                                                                                                                                                                                                                  |
| <b>16. Welche der folgenden Medien werden von Ihrer Frauenärztin/Ihrem Frauenarzt und/oder Ihrer Hebamme/Ihrem Entbindungspfleger in der Aufklärung über das Gesundheitsverhalten in der <u>Stillzeit</u> verwendet? (Mehrfachnennungen sind möglich)</b>                                                                                                                                                                                                                                                                                                                     |                                                                                                                                                                                                                                                                                                                                                                                                                                                                                                                                                                                  |
| <b><u>Frauenärztin/Frauenarzt:</u></b><br><input type="checkbox"/> (Internet-) Adressen von Beratungs-/ Informationsstellen/ Portalen<br><input type="checkbox"/> Apps<br><input type="checkbox"/> Bücher<br><input type="checkbox"/> Flyer<br><input type="checkbox"/> Informationsbroschüren<br><input type="checkbox"/> Merkzettel<br><input type="checkbox"/> Tonaufnahmen/Podcasts<br><input type="checkbox"/> Video-/Filmmaterial<br><input type="checkbox"/> Zeitschriften<br><input type="checkbox"/> Keine Medien<br><input type="checkbox"/> Sonstige Medien: _____ | <b><u>Hebamme/Entbindungspfleger:</u></b><br><input type="checkbox"/> (Internet-) Adressen von Beratungs-/ Informationsstellen/ Portalen<br><input type="checkbox"/> Apps<br><input type="checkbox"/> Bücher<br><input type="checkbox"/> Flyer<br><input type="checkbox"/> Informationsbroschüren<br><input type="checkbox"/> Merkzettel<br><input type="checkbox"/> Tonaufnahmen/Podcasts<br><input type="checkbox"/> Video-/Filmmaterial<br><input type="checkbox"/> Zeitschriften<br><input type="checkbox"/> Keine Medien<br><input type="checkbox"/> Sonstige Medien: _____ |
| <b>17. Wie gut fühlen Sie sich von Ihrer Frauenärztin/ Ihrem Frauenarzt und/oder Ihrer Hebammen/ Ihrem Entbindungspfleger über das Gesundheitsverhalten in der <u>Schwangerschaft</u> aufgeklärt?</b>                                                                                                                                                                                                                                                                                                                                                                         |                                                                                                                                                                                                                                                                                                                                                                                                                                                                                                                                                                                  |
| <b><u>Frauenärztin/ Frauenarzt:</u></b><br><input type="checkbox"/> sehr gut aufgeklärt<br><input type="checkbox"/> gut aufgeklärt<br><input type="checkbox"/> mittelmäßig aufgeklärt<br><input type="checkbox"/> kaum aufgeklärt<br><input type="checkbox"/> schlecht aufgeklärt<br><input type="checkbox"/> gar nicht aufgeklärt                                                                                                                                                                                                                                            | <b><u>Hebamme/Entbindungspfleger:</u></b><br><input type="checkbox"/> sehr gut aufgeklärt<br><input type="checkbox"/> gut aufgeklärt<br><input type="checkbox"/> mittelmäßig aufgeklärt<br><input type="checkbox"/> kaum aufgeklärt<br><input type="checkbox"/> schlecht aufgeklärt<br><input type="checkbox"/> gar nicht aufgeklärt                                                                                                                                                                                                                                             |

|                                                                                                                                                                                                                                                                                                                                                                                                                                                                                                                                                                                |                                                                                                                                                                                                                                                                                                                                                                                                                                                                                                                                                                          |
|--------------------------------------------------------------------------------------------------------------------------------------------------------------------------------------------------------------------------------------------------------------------------------------------------------------------------------------------------------------------------------------------------------------------------------------------------------------------------------------------------------------------------------------------------------------------------------|--------------------------------------------------------------------------------------------------------------------------------------------------------------------------------------------------------------------------------------------------------------------------------------------------------------------------------------------------------------------------------------------------------------------------------------------------------------------------------------------------------------------------------------------------------------------------|
| <b>18. Wie gut fühlen Sie sich von Ihrer Frauenärztin/ Ihrem Frauenarzt und/oder Ihrer Hebammen/ Ihrem Entbindungspfleger über das Gesundheitsverhalten in der <u>Stillzeit</u> aufgeklärt?</b>                                                                                                                                                                                                                                                                                                                                                                                |                                                                                                                                                                                                                                                                                                                                                                                                                                                                                                                                                                          |
| <b><u>Frauenärztin/ Frauenarzt:</u></b><br><input type="checkbox"/> sehr gut aufgeklärt<br><input type="checkbox"/> gut aufgeklärt<br><input type="checkbox"/> mittelmäßig aufgeklärt<br><input type="checkbox"/> kaum aufgeklärt<br><input type="checkbox"/> schlecht aufgeklärt<br><input type="checkbox"/> gar nicht aufgeklärt                                                                                                                                                                                                                                             | <b><u>Hebamme/Entbindungspfleger:</u></b><br><input type="checkbox"/> sehr gut aufgeklärt<br><input type="checkbox"/> gut aufgeklärt<br><input type="checkbox"/> mittelmäßig aufgeklärt<br><input type="checkbox"/> kaum aufgeklärt<br><input type="checkbox"/> schlecht aufgeklärt<br><input type="checkbox"/> gar nicht aufgeklärt                                                                                                                                                                                                                                     |
| <b>19. Stehen Ihnen Medien mit Informationen zum Gesundheitsverhalten in der Schwangerschaft und Stillzeit zur Verfügung?</b>                                                                                                                                                                                                                                                                                                                                                                                                                                                  |                                                                                                                                                                                                                                                                                                                                                                                                                                                                                                                                                                          |
| <b><u>Für die Schwangerschaft:</u></b><br><input type="checkbox"/> Ja<br><input type="checkbox"/> Nein → Weiter mit Frage 22                                                                                                                                                                                                                                                                                                                                                                                                                                                   | <b><u>Für die Stillzeit:</u></b><br><input type="checkbox"/> Ja<br><input type="checkbox"/> Nein → Weiter mit Frage 22                                                                                                                                                                                                                                                                                                                                                                                                                                                   |
| <b>20. Nutzen Sie die Ihnen zur Verfügung stehenden Medien mit Informationen zum Gesundheitsverhalten in der Schwangerschaft und Stillzeit?</b>                                                                                                                                                                                                                                                                                                                                                                                                                                |                                                                                                                                                                                                                                                                                                                                                                                                                                                                                                                                                                          |
| <b><u>Für die Schwangerschaft:</u></b><br><input type="checkbox"/> Ja<br><input type="checkbox"/> Nein → Weiter mit Frage 22                                                                                                                                                                                                                                                                                                                                                                                                                                                   | <b><u>Für die Stillzeit:</u></b><br><input type="checkbox"/> Ja<br><input type="checkbox"/> Nein → Weiter mit Frage 22                                                                                                                                                                                                                                                                                                                                                                                                                                                   |
| <b>21. Welche der folgenden Medien mit Informationen zum gesundheitsrelevanten Verhalten nutzen Sie? (Mehrfachnennungen sind möglich)</b>                                                                                                                                                                                                                                                                                                                                                                                                                                      |                                                                                                                                                                                                                                                                                                                                                                                                                                                                                                                                                                          |
| <b><u>Über die Schwangerschaft:</u></b><br><input type="checkbox"/> (Internet-) Adressen von Beratungs-/ Informationsstellen/ Portalen<br><input type="checkbox"/> Apps<br><input type="checkbox"/> Bücher<br><input type="checkbox"/> Flyer<br><input type="checkbox"/> Informationsbroschüren<br><input type="checkbox"/> Merkzettel<br><input type="checkbox"/> Tonaufnahmen/Podcasts<br><input type="checkbox"/> Video-/Filmmaterial<br><input type="checkbox"/> Zeitschriften<br><input type="checkbox"/> Keine Medien<br><input type="checkbox"/> Sonstige Medien: _____ | <b><u>Über die Stillzeit:</u></b><br><input type="checkbox"/> (Internet-) Adressen von Beratungs-/ Informationsstellen/ Portalen<br><input type="checkbox"/> Apps<br><input type="checkbox"/> Bücher<br><input type="checkbox"/> Flyer<br><input type="checkbox"/> Informationsbroschüren<br><input type="checkbox"/> Merkzettel<br><input type="checkbox"/> Tonaufnahmen/Podcasts<br><input type="checkbox"/> Video-/Filmmaterial<br><input type="checkbox"/> Zeitschriften<br><input type="checkbox"/> Keine Medien<br><input type="checkbox"/> Sonstige Medien: _____ |
| <b><u>B Zugang zu Medien</u></b>                                                                                                                                                                                                                                                                                                                                                                                                                                                                                                                                               |                                                                                                                                                                                                                                                                                                                                                                                                                                                                                                                                                                          |
| <b>22. Wo befinden sich die Medien mit Informationen zum Gesundheitsverhalten in der Schwangerschaft und Stillzeit bei Ihrer Frauenärztin/Ihrem Frauenarzt und/oder Ihrer Hebamme/Ihrem Entbindungspfleger? (Mehrfachnennungen sind möglich)</b>                                                                                                                                                                                                                                                                                                                               |                                                                                                                                                                                                                                                                                                                                                                                                                                                                                                                                                                          |
| <b><u>Frauenärztin/Frauenarzt:</u></b><br><input type="checkbox"/> Im Wartebereich<br><input type="checkbox"/> Bei der Anmeldung<br><input type="checkbox"/> Im Eingangsbereich<br><input type="checkbox"/> Im Behandlungsraum<br><input type="checkbox"/> Keine Medien wahrgenommen<br><input type="checkbox"/> Ich weiß es nicht<br><input type="checkbox"/> Anderer Ort: _____                                                                                                                                                                                              | <b><u>Hebamme/Entbindungspfleger:</u></b><br><input type="checkbox"/> Im Wartebereich<br><input type="checkbox"/> Bei der Anmeldung<br><input type="checkbox"/> Im Eingangsbereich<br><input type="checkbox"/> Im Behandlungsraum<br><input type="checkbox"/> Keine Medien wahrgenommen<br><input type="checkbox"/> Ich weiß es nicht<br><input type="checkbox"/> Anderer Ort: _____                                                                                                                                                                                     |
| <b>23. Welche Hürden begegnen Ihnen beim Zugang zu diesen Medien? (Mehrfachnennungen sind möglich)</b>                                                                                                                                                                                                                                                                                                                                                                                                                                                                         |                                                                                                                                                                                                                                                                                                                                                                                                                                                                                                                                                                          |
| Medien mit Informationen zum Gesundheitsverhalten in der Schwangerschaft und Stillzeit sind...                                                                                                                                                                                                                                                                                                                                                                                                                                                                                 |                                                                                                                                                                                                                                                                                                                                                                                                                                                                                                                                                                          |
| <input type="checkbox"/> nicht frei zugänglich<br><input type="checkbox"/> nur auf Nachfrage erhältlich<br><input type="checkbox"/> nicht mit Hinweisen versehen<br><input type="checkbox"/> nur analog<br><input type="checkbox"/> nicht mit Hürden verbunden<br><input type="checkbox"/> aktuell nicht relevant für mich                                                                                                                                                                                                                                                     | <input type="checkbox"/> kostenpflichtig<br><input type="checkbox"/> nur vor Ort nutzbar<br><input type="checkbox"/> nur digital<br><input type="checkbox"/> nicht vorhanden<br><input type="checkbox"/> Sonstige Hürden: _____                                                                                                                                                                                                                                                                                                                                          |

**C Probleme in dem Umgang und der Nutzung mit/von Medien****24. Welche Probleme haben Sie in der Nutzung der zur Verfügung stehenden Medien?**

(Mehrfachnennungen sind möglich)

Medien mit Informationen zum Gesundheitsverhalten in der Schwangerschaft und Stillzeit sind...

- |                                                          |                                                         |
|----------------------------------------------------------|---------------------------------------------------------|
| <input type="checkbox"/> schwer verständlich (Sprache)   | <input type="checkbox"/> nicht interessant              |
| <input type="checkbox"/> schwer verständlich (Inhalt)    | <input type="checkbox"/> zu zeitaufwändig               |
| <input type="checkbox"/> nicht informativ genug          | <input type="checkbox"/> kompliziert in der Handhabung  |
| <input type="checkbox"/> zu informativ                   | <input type="checkbox"/> nicht mit Erklärungen versehen |
| <input type="checkbox"/> von schlechter Qualität         | <input type="checkbox"/> nicht attraktiv                |
| <input type="checkbox"/> unproblematisch                 | <input type="checkbox"/> sonstige Probleme: _____       |
| <input type="checkbox"/> aktuell nicht relevant für mich |                                                         |

**D Bevorzugte Medien****25. Wie wichtig finden Sie Informationen zur Aufklärung über ein empfohlenes Gesundheitsverhalten in der Schwangerschaft von den folgenden Informationsquellen?****a) Familie/Freunden/Bekannten**

- ☐
- sehr wichtig
- ☐
- wichtig
- ☐
- etwas wichtig
- ☐
- kaum wichtig
- ☐
- gar nicht wichtig

**b) Ihrer Frauenärztin/Ihrem Frauenarzt**

- ☐
- sehr wichtig
- ☐
- wichtig
- ☐
- etwas wichtig
- ☐
- kaum wichtig
- ☐
- gar nicht wichtig

**c) Ihrer Hebamme/Ihrem Entbindungspfleger**

- ☐
- sehr wichtig
- ☐
- wichtig
- ☐
- etwas wichtig
- ☐
- kaum wichtig
- ☐
- gar nicht wichtig

**d) Medien, von Frauenärztinnen/Frauenärzten oder Hebammen/Entbindungspflegern erstellt:**

- ☐
- sehr wichtig
- ☐
- wichtig
- ☐
- etwas wichtig
- ☐
- kaum wichtig
- ☐
- gar nicht wichtig

**e) Medien, erstellt von Krankenkassen erstellt:**

- ☐
- sehr wichtig
- ☐
- wichtig
- ☐
- etwas wichtig
- ☐
- kaum wichtig
- ☐
- gar nicht wichtig

**f) Medien, erstellt von Schwangerschafts-/Still-/Babyprodukte Herstellern etc.:**

- ☐
- sehr wichtig
- ☐
- wichtig
- ☐
- etwas wichtig
- ☐
- kaum wichtig
- ☐
- gar nicht wichtig

**26. Wie wichtig finden Sie Informationen zur Aufklärung über ein empfohlenes Gesundheitsverhalten in der Stillzeit von den folgenden Informationsquellen?****a) Familie/Freunden/Bekannten**

- ☐
- sehr wichtig
- ☐
- wichtig
- ☐
- etwas wichtig
- ☐
- kaum wichtig
- ☐
- gar nicht wichtig

**b) Ihrer Frauenärztin/Ihrem Frauenarzt**

- ☐
- sehr wichtig
- ☐
- wichtig
- ☐
- etwas wichtig
- ☐
- kaum wichtig
- ☐
- gar nicht wichtig

**c) Ihrer Hebamme/Ihrem Entbindungspfleger**

- ☐
- sehr wichtig
- ☐
- wichtig
- ☐
- etwas wichtig
- ☐
- kaum wichtig
- ☐
- gar nicht wichtig

**d) Medien, von Frauenärztinnen/Frauenärzten oder Hebammen/Entbindungspflegern erstellt:**

- ☐
- sehr wichtig
- ☐
- wichtig
- ☐
- etwas wichtig
- ☐
- kaum wichtig
- ☐
- gar nicht wichtig

**e) Medien, erstellt von Krankenkassen erstellt:**

- ☐
- sehr wichtig
- ☐
- wichtig
- ☐
- etwas wichtig
- ☐
- kaum wichtig
- ☐
- gar nicht wichtig

**f) Medien, erstellt von Schwangerschafts-/Still-/Babyprodukte Herstellern etc.:**

- ☐
- sehr wichtig
- ☐
- wichtig
- ☐
- etwas wichtig
- ☐
- kaum wichtig
- ☐
- gar nicht wichtig

**27. Welche Art an Medien mit Informationen zum Gesundheitsverhalten in der Schwangerschaft und Stillzeit wünschen Sie sich zur Nutzung vor Ort in einer Frauenarztpraxis und/oder Hebammenpraxis?****Frauenärztin/Frauenarzt:**

- ☐
- Analog (z.B. Buch, Zeitschrift, etc.)
- 
- ☐
- Digital (z.B. Film, App, etc.)
- 
- ☐
- Analog
- und
- digital
- 
- ☐
- Keine Medien

**Hebamme/Entbindungspfleger:**

- ☐
- Analog (z.B. Buch, Zeitschrift, etc.)
- 
- ☐
- Digital (z.B. Film, App, etc.)
- 
- ☐
- Analog
- und
- digital
- 
- ☐
- Keine Medien

**28. Welche der folgenden Medien mit Informationen zum Gesundheitsverhalten in der Schwangerschaft und Stillzeit wünschen Sie sich, zur Nutzung vor Ort in der Frauenarztpraxis und/oder Hebammenpraxis?**  
(Mehrfachnennungen sind möglich)

**Frauenärztin/Frauenarzt:**

- ☐ (Internet-) Adressen von Beratungs-/ Informationsstellen/ Portalen
- ☐ Apps
- ☐ Bücher
- ☐ Flyer
- ☐ Informationsbroschüren
- ☐ Merkzettel
- ☐ Tonaufnahmen/Podcasts
- ☐ Video-/Filmmaterial
- ☐ Zeitschriften
- ☐ Keine Medien
- ☐ Sonstige Medien: \_\_\_\_\_

**Hebamme/Entbindungspfleger:**

- ☐ (Internet-) Adressen von Beratungs-/ Informationsstellen/ Portalen
- ☐ Apps
- ☐ Bücher
- ☐ Flyer
- ☐ Informationsbroschüren
- ☐ Merkzettel
- ☐ Tonaufnahmen/Podcasts
- ☐ Video-/Filmmaterial
- ☐ Zeitschriften
- ☐ Keine Medien
- ☐ Sonstige Medien: \_\_\_\_\_

**29. Welche Art an Medien mit Informationen zum Gesundheitsverhalten in der Schwangerschaft und Stillzeit wünschen Sie sich, zur Nutzung zu Hause?**

- ☐ Analog (z.B. Zeitschrift, Flyer, etc.)
- ☐ Digital (z.B. Film, Podcast, etc.)
- ☐ Analog und digital
- ☐ Keine Medien

**30. Welche der folgenden Medien mit Informationen zum Gesundheitsverhalten in der Schwangerschaft und Stillzeit wünschen Sie sich, zur Nutzung zu Hause?** (Mehrfachnennungen sind möglich)

- |                                                                                             |                                                 |
|---------------------------------------------------------------------------------------------|-------------------------------------------------|
| <input type="checkbox"/> (Internet-) Adressen von Beratungs-/ Informationsstellen/ Portalen | <input type="checkbox"/> Tonaufnahmen/Podcasts  |
| <input type="checkbox"/> Apps                                                               | <input type="checkbox"/> Video-/Filmmaterial    |
| <input type="checkbox"/> Bücher                                                             | <input type="checkbox"/> Zeitschriften          |
| <input type="checkbox"/> Flyer                                                              | <input type="checkbox"/> Keine Medien           |
| <input type="checkbox"/> Informationsbroschüren                                             | <input type="checkbox"/> Sonstige Medien: _____ |
| <input type="checkbox"/> Merkzettel                                                         |                                                 |

**31. Zu welchen der folgenden Themen haben Sie sich bereits Informationen eingeholt?**  
(Mehrfachnennungen sind möglich)

- |                                        |                                          |                                    |
|----------------------------------------|------------------------------------------|------------------------------------|
| Ernährung in der                       | <input type="checkbox"/> Schwangerschaft | <input type="checkbox"/> Stillzeit |
| Nahrungsergänzungsmittel in der        | <input type="checkbox"/> Schwangerschaft | <input type="checkbox"/> Stillzeit |
| Koffein in der                         | <input type="checkbox"/> Schwangerschaft | <input type="checkbox"/> Stillzeit |
| Sport & Körperliche Aktivität in der   | <input type="checkbox"/> Schwangerschaft | <input type="checkbox"/> Stillzeit |
| Alkohol/ Tabak/ illegale Drogen in der | <input type="checkbox"/> Schwangerschaft | <input type="checkbox"/> Stillzeit |
| Medikamente in der                     | <input type="checkbox"/> Schwangerschaft | <input type="checkbox"/> Stillzeit |
| Stress & Entspannungstechniken in der  | <input type="checkbox"/> Schwangerschaft | <input type="checkbox"/> Stillzeit |

**32. Zu welchen der folgenden Themen wünschen Sie sich mehr Informationen?** (Mehrfachnennungen sind möglich)

- |                                        |                                          |                                    |
|----------------------------------------|------------------------------------------|------------------------------------|
| Ernährung in der                       | <input type="checkbox"/> Schwangerschaft | <input type="checkbox"/> Stillzeit |
| Nahrungsergänzungsmittel in der        | <input type="checkbox"/> Schwangerschaft | <input type="checkbox"/> Stillzeit |
| Koffein in der                         | <input type="checkbox"/> Schwangerschaft | <input type="checkbox"/> Stillzeit |
| Sport & Körperliche Aktivität in der   | <input type="checkbox"/> Schwangerschaft | <input type="checkbox"/> Stillzeit |
| Alkohol/ Tabak/ illegale Drogen in der | <input type="checkbox"/> Schwangerschaft | <input type="checkbox"/> Stillzeit |
| Medikamente in der                     | <input type="checkbox"/> Schwangerschaft | <input type="checkbox"/> Stillzeit |
| Stress & Entspannungstechniken in der  | <input type="checkbox"/> Schwangerschaft | <input type="checkbox"/> Stillzeit |

**33. Welchen Schwerpunkt sollen die Informationen über die Schwangerschaft haben?**

(Mehrfachnennungen sind möglich)

Die Informationen über die Schwangerschaft sollen...

- ☐ Empfehlungen über einen gesunden Lebensstil/Verhalten (körperliche Aktivität, Ernährung, Stress, Suchtmittelkonsum) vermitteln.
- ☐ Empfehlungen zur Vermeidung eines risikobehafteten Lebensstils/ Verhaltens vermitteln.
- ☐ mögliche lebensstilbedingte Risiken in der Schwangerschaft vermitteln.
- ☐ Rezeptvorschläge für das Kochen im Alltag in der Schwangerschaft beinhalten.
- ☐ Bewegungsübungen für den Alltag in der Schwangerschaft beinhalten.
- ☐ Entspannungsübungen für den Alltag in der Schwangerschaft beinhalten.
- ☐ Vorschläge für Alternativen zu Suchtmitteln wie Tabak etc. beinhalten.
- ☐ Empfehlungen über zu vermeidende Medikamente beinhalten.
- ☐ Empfehlungen über notwendige Nahrungsergänzungsmitteln beinhalten.

**34. Welchen Schwerpunkt sollen die Informationen über die Stillzeit haben?** (Mehrfachnennungen sind möglich)Die Informationen über die Stillzeit sollen...

- ☐ Empfehlungen über einen gesunden Lebensstil/Verhalten (körperliche Aktivität, Ernährung, Stress, Suchtmittelkonsum) vermitteln.
- ☐ Empfehlungen zur Vermeidung eines risikobehafteten Lebensstils/ Verhaltens vermitteln.
- ☐ mögliche lebensstilbedingte Risiken in der Stillzeit vermitteln.
- ☐ Rezeptvorschläge für das Kochen im Alltag in der Stillzeit beinhalten.
- ☐ Bewegungsübungen für den Alltag in der Stillzeit beinhalten.
- ☐ Entspannungsübungen für den Alltag in der Stillzeit beinhalten.
- ☐ Vorschläge für Alternativen zu Suchtmitteln wie Tabak etc. beinhalten.
- ☐ Empfehlungen über zu vermeidende Medikamente beinhalten.
- ☐ Empfehlungen über notwendige Nahrungsergänzungsmitteln beinhalten.

**E Soziodemografische Daten****35. Leben Sie derzeit in einer Partnerschaft?**

- ☐ Ja ☐ Nein

**36. Wie alt sind Sie? \_\_\_\_\_ Jahre****37. Wie viele leibliche Kinder haben Sie? \_\_\_\_\_ leibliche Kinder****38. Was ist Ihr höchster erworbener Schulabschluss?**

- |                                                              |                                                              |
|--------------------------------------------------------------|--------------------------------------------------------------|
| <input type="checkbox"/> Haupt- / Volksschulabschluss        | <input type="checkbox"/> Realschulabschluss (Mittlere Reife) |
| <input type="checkbox"/> Abschluss Polytechnische Oberschule | <input type="checkbox"/> Fachhochschulreife                  |
| <input type="checkbox"/> Abitur (Gymnasium bzw. EOS)         | <input type="checkbox"/> Anderer Schulabschluss: _____       |
| <input type="checkbox"/> Schule beendet ohne Schulabschluss  | <input type="checkbox"/> (Noch) keinen Abschluss             |

**39. Haben Sie eine abgeschlossene berufliche/ akademische Ausbildung? Wenn ja, welche?**

- |                                                                                           |                                                                                                     |
|-------------------------------------------------------------------------------------------|-----------------------------------------------------------------------------------------------------|
| <input type="checkbox"/> Lehre (beruflich-betrieblich)                                    | <input type="checkbox"/> Berufs-/ Handelsschule (beruflich-schulisch)                               |
| <input type="checkbox"/> Fachschule (Meister-/Technikerschule, Berufs-/Fachakademie)      | <input type="checkbox"/> Fachhoch-/Ingenieurschule                                                  |
| <input type="checkbox"/> Diplom                                                           | <input type="checkbox"/> Bachelor                                                                   |
| <input type="checkbox"/> Promotion                                                        | <input type="checkbox"/> Master/ Magister/ Staatsexamen                                             |
| <input type="checkbox"/> In beruflicher/akademischer Ausbildung (Studentin/Auszubildende) | <input type="checkbox"/> Habilitation                                                               |
| <input type="checkbox"/> Anderer Ausbildungsabschluss: _____                              | <input type="checkbox"/> Kein beruflicher/akademischer Abschluss (und auch nicht in der Ausbildung) |

|                                                                                                                                                                                                                                                                                                                                                                                                                                                                                                                                                                                                                                                                                                                                                         |                                                                                                                                                                                                                                                                                                                                 |
|---------------------------------------------------------------------------------------------------------------------------------------------------------------------------------------------------------------------------------------------------------------------------------------------------------------------------------------------------------------------------------------------------------------------------------------------------------------------------------------------------------------------------------------------------------------------------------------------------------------------------------------------------------------------------------------------------------------------------------------------------------|---------------------------------------------------------------------------------------------------------------------------------------------------------------------------------------------------------------------------------------------------------------------------------------------------------------------------------|
| <b>40. In welcher beruflichen Stellung sind/waren Sie hauptsächlich beschäftigt?</b>                                                                                                                                                                                                                                                                                                                                                                                                                                                                                                                                                                                                                                                                    |                                                                                                                                                                                                                                                                                                                                 |
| <u>Arbeiterin:</u><br><input type="checkbox"/> Ungelernte Arbeiterin <span style="margin-left: 150px;"><input type="checkbox"/> Angelernte Arbeiterin</span><br><input type="checkbox"/> Gelernte Arbeiterin/ Facharbeiterin <span style="margin-left: 150px;"><input type="checkbox"/> Vorarbeiterin, Meisterin, o.ä.</span>                                                                                                                                                                                                                                                                                                                                                                                                                           |                                                                                                                                                                                                                                                                                                                                 |
| <u>Selbstständige</u> (einschließlich mithelfender Familienmitglieder):<br><input type="checkbox"/> Landwirtin/ Genossenschaftsbäuerin <span style="margin-left: 150px;"><input type="checkbox"/> Akademikerin/ freier Beruf</span><br><input type="checkbox"/> Sonstiges mit bis zu 9 Mitarbeitern <span style="margin-left: 150px;"><input type="checkbox"/> Sonstiges mit 10 und mehr Mitarbeitern</span><br><input type="checkbox"/> Mithelfende Familienangehörige                                                                                                                                                                                                                                                                                 |                                                                                                                                                                                                                                                                                                                                 |
| <u>Angestellte:</u><br><input type="checkbox"/> Industrie-/ Werkmeisterin<br><input type="checkbox"/> Einfache Tätigkeit (z.B. Verkäuferin)<br><input type="checkbox"/> Qualifizierte Tätigkeit (z.B. Buchhalterin, Sachbearbeiterin, o.ä.)<br><input type="checkbox"/> Hochqualifizierte Tätigkeit/ Leitungsfunktion (z.B. Abteilungsleiterin, Prokuristin, o.ä.)<br><input type="checkbox"/> Umfassende Führungsaufgaben (z.B. Geschäftsführerin, Direktorin, o.ä.)                                                                                                                                                                                                                                                                                   |                                                                                                                                                                                                                                                                                                                                 |
| <u>Beamtin</u> (einschließlich Richterin, Berufssoldatin):<br><input type="checkbox"/> Einfacher Dienst <span style="margin-left: 150px;"><input type="checkbox"/> Mittlerer Dienst</span><br><input type="checkbox"/> Gehobener Dienst <span style="margin-left: 150px;"><input type="checkbox"/> Höherer Dienst</span>                                                                                                                                                                                                                                                                                                                                                                                                                                |                                                                                                                                                                                                                                                                                                                                 |
| <u>Sonstige:</u><br><input type="checkbox"/> Schülerin, Studentin, Praktikantin, Auszubildende o.ä.<br><input type="checkbox"/> Hausfrau                                                                                                                                                                                                                                                                                                                                                                                                                                                                                                                                                                                                                |                                                                                                                                                                                                                                                                                                                                 |
| <b>41. In welcher Krankenversicherung sind Sie versichert? (Mehrfachnennungen sind möglich)</b>                                                                                                                                                                                                                                                                                                                                                                                                                                                                                                                                                                                                                                                         |                                                                                                                                                                                                                                                                                                                                 |
| Gesetzliche Krankenversicherung<br><input type="checkbox"/> Allgemeine Ortskrankenkasse<br><input type="checkbox"/> Ersatzkrankenkasse (Barmer, DAK, TK, GEK, usw.)<br><input type="checkbox"/> Betriebskrankenkasse (BKK)<br><input type="checkbox"/> Innungskrankenkasse (IKK)<br><input type="checkbox"/> Andere gesetzliche Krankenkassen<br>Private Krankenversicherung<br><input type="checkbox"/> Vollversicherung<br><input type="checkbox"/> Zusatzversicherung<br>Andere Krankenversicherung<br><input type="checkbox"/> Beihilfe (z.B. Öffentlicher Dienst)<br><input type="checkbox"/> Ausländische Krankenkasse<br><input type="checkbox"/> Sonstiger Anspruch auf Krankenversorgung<br><input type="checkbox"/> Keine Krankenversicherung |                                                                                                                                                                                                                                                                                                                                 |
| <b>42. Wie hoch ist das durchschnittliche monatliche Haushaltseinkommen, d.h. das Nettoeinkommen, das alle Haushaltsmitglieder zusammen nach Abzug von Steuern und Sozialabgaben haben? (Einschließlich Erziehungsgeld und Kindergeld)</b>                                                                                                                                                                                                                                                                                                                                                                                                                                                                                                              |                                                                                                                                                                                                                                                                                                                                 |
| <input type="checkbox"/> unter 500 Euro<br><input type="checkbox"/> 500 bis unter 750 Euro<br><input type="checkbox"/> 750 bis unter 1.000 Euro<br><input type="checkbox"/> 1.000 bis unter 1.250 Euro<br><input type="checkbox"/> 1.250 bis unter 1.500 Euro<br><input type="checkbox"/> 1.500 bis unter 1.750 Euro<br><input type="checkbox"/> 1.750 bis unter 2.000 Euro                                                                                                                                                                                                                                                                                                                                                                             | <input type="checkbox"/> 2.000 bis unter 2.250 Euro<br><input type="checkbox"/> 2.250 bis unter 2.500 Euro<br><input type="checkbox"/> 2.500 bis unter 3.000 Euro<br><input type="checkbox"/> 3.000 bis unter 4.000 Euro<br><input type="checkbox"/> 4.000 bis unter 5.000 Euro<br><input type="checkbox"/> 5.000 Euro und mehr |
| <b>43. In welchem Land sind Sie geboren?</b>                                                                                                                                                                                                                                                                                                                                                                                                                                                                                                                                                                                                                                                                                                            |                                                                                                                                                                                                                                                                                                                                 |
| <input type="checkbox"/> Deutschland                                                                                                                                                                                                                                                                                                                                                                                                                                                                                                                                                                                                                                                                                                                    | <input type="checkbox"/> Anderes Land: _____                                                                                                                                                                                                                                                                                    |
| <b>44. In welchem Land sind Ihre Eltern geboren?</b>                                                                                                                                                                                                                                                                                                                                                                                                                                                                                                                                                                                                                                                                                                    |                                                                                                                                                                                                                                                                                                                                 |
| Mutter:<br><input type="checkbox"/> Deutschland<br><input type="checkbox"/> Anderes Land: _____                                                                                                                                                                                                                                                                                                                                                                                                                                                                                                                                                                                                                                                         | Vater:<br><input type="checkbox"/> Deutschland<br><input type="checkbox"/> Anderes Land: _____                                                                                                                                                                                                                                  |

**Vielen herzlichen Dank für Ihre Teilnahme!**
